# Supplementary material
Source: PubMed Central journal article supplement (PMC7116018)

APPENDIX  
TEST-RETEST IMAGES

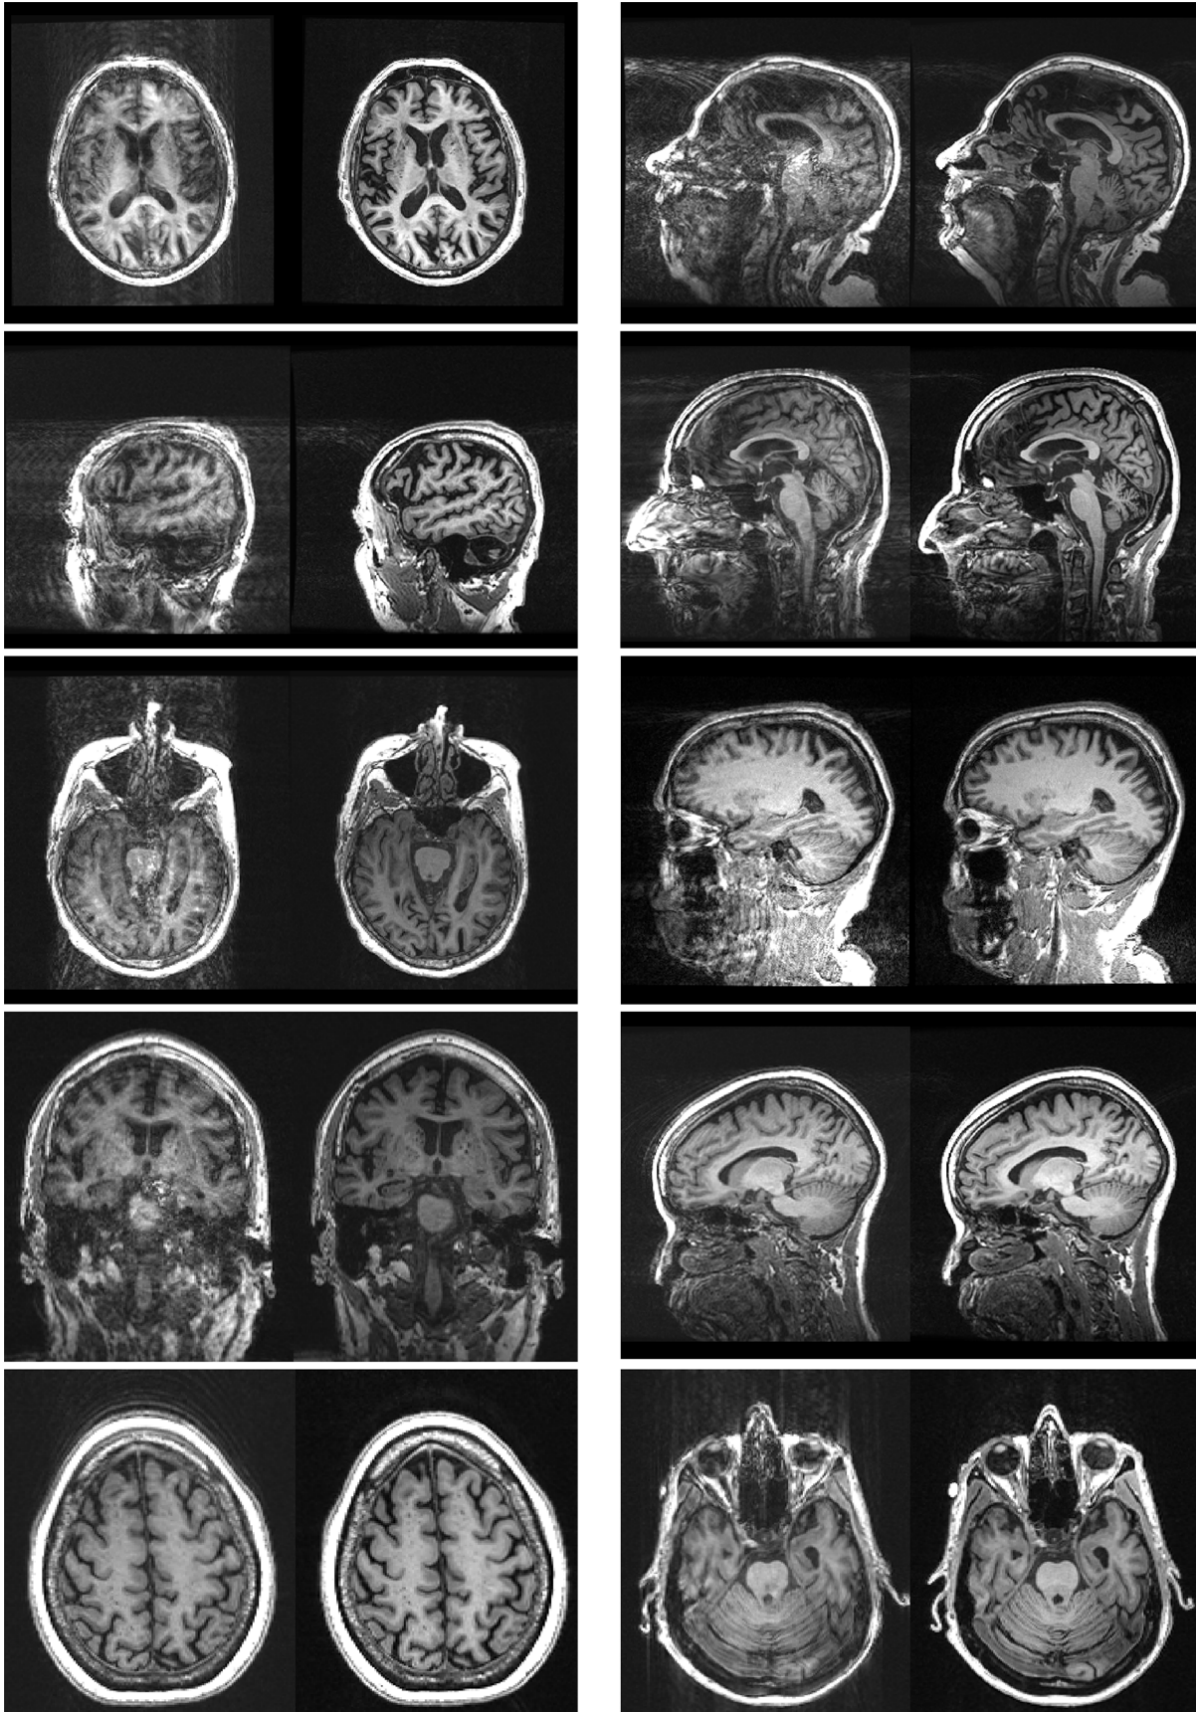

Supplement: EMS85828-supplement-Appendix.pdf [file EMS85828-supplement-Appendix.pdf]
